# Supplementary material for: Biomarker results from a phase II study of MEK1/2 inhibitor binimetinib (MEK162) in patients with advanced NRAS- or BRAF-mutated melanoma
Source: PubMed Central journal article supplement (PMC6442999; doi:10.18632/oncotarget.26753), 2019-03-05
Supplement: oncotarget-10-1850-s001.pdf [file oncotarget-10-1850-s001.pdf]

## Biomarker results from a phase II study of MEK1/2 inhibitor binimetinib (MEK162) in patients with advanced *NRAS*- or *BRAF*-mutated melanoma

### SUPPLEMENTARY MATERIALS

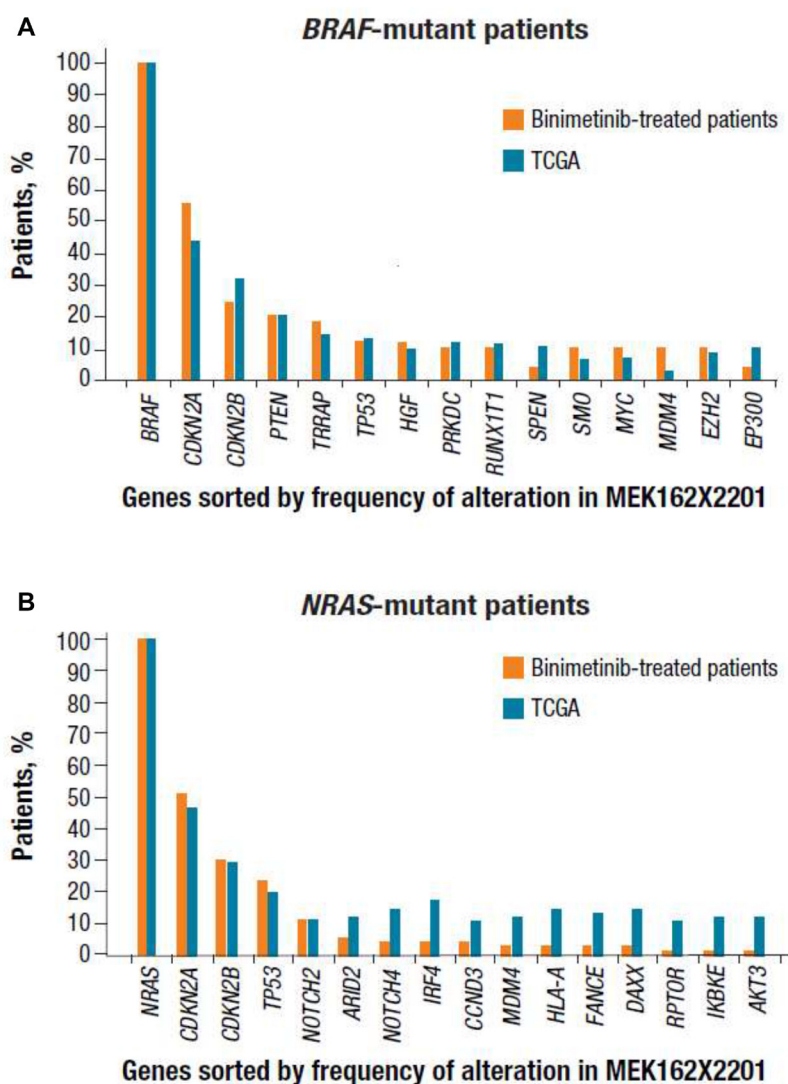

**Supplementary Figure 1:** Study data on gene alterations in (A) *BRAF*- and (B) *NRAS*-mutated melanoma patients treated with binimetinib vs data from The Cancer Genome Atlas (TCGA). Genes sorted by frequency of alteration in binimetinib-treated patients. TCGA, The Cancer Genome Atlas.

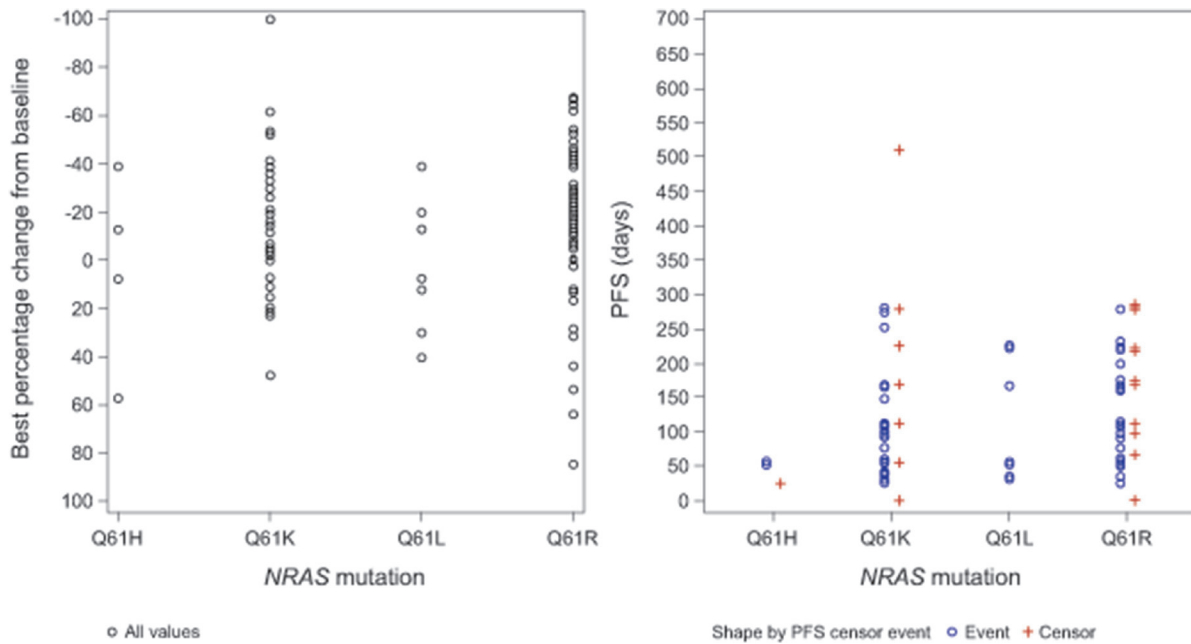

Supplementary Figure 2: Best percentage change from baseline in sum of the longest diameter and progression-free survival by different Q61 mutation types for *NRAS*-mutated patients. PFS, progression-free survival.

**Supplementary Table 1: Patient demographics and baseline characteristics**

|                                        | <i>BRAF</i> -mutated patients receiving binimetinib 45 mg (n = 41) | <i>BRAF</i> -mutated patients receiving binimetinib 60 mg (n = 25) | <i>NRAS</i> -mutated patients receiving binimetinib 45 mg (n = 117) | All patients (N = 183)       |
|----------------------------------------|--------------------------------------------------------------------|--------------------------------------------------------------------|---------------------------------------------------------------------|------------------------------|
| Age, median (range), years             | 57 (21–81)                                                         | 52 (27–70)                                                         | 62 (26–84)                                                          | 58 (21–84)                   |
| Sex, n (%)                             |                                                                    |                                                                    |                                                                     |                              |
| Male/Female                            | 22 (53.7)/19 (46.3)                                                | 8 (32.0)/17 (68.0)                                                 | 84 (71.8)/33 (28.2)                                                 | 114 (62.3)/69 (37.7)         |
| WHO performance status, n (%)          |                                                                    |                                                                    |                                                                     |                              |
| 0/1/2                                  | 33 (80.5)/8 (19.5)/0                                               | 19 (76.0)/5 (20.0)/1 (4.0)                                         | 82 (70.1)/30 (25.6)/5 (4.3)                                         | 134 (73.2)/43 (23.5)/6 (3.3) |
| Melanoma type, n (%)                   |                                                                    |                                                                    |                                                                     |                              |
| Cutaneous                              | 40 (97.6)                                                          | 23 (92.0)                                                          | 111 (94.9)                                                          | 174 (95.1)                   |
| Noncutaneous                           | 0                                                                  | 0                                                                  | 4 (3.4) <sup>a</sup>                                                | 4 (2.2)                      |
| Missing                                | 1 (2.4)                                                            | 2 (8.0)                                                            | 2 (1.7)                                                             | 5 (2.7)                      |
| Stage IV, n (%)                        |                                                                    |                                                                    |                                                                     |                              |
| At initial diagnosis/current stage     | 6 (14.6)/40 (97.6)                                                 | 2 (8.0)/23 (92.0)                                                  | 19 (16.2)/110 (94.0)                                                | 27 (14.8)/173 (94.5)         |
| Elevated LDH (U/L) at baseline, n (%)  | 16 (39.0)                                                          | 8 (32.0)                                                           | 45 (38.5)                                                           | 69 (37.7)                    |
| <i>BRAF</i> mutation status, n (%)     |                                                                    |                                                                    |                                                                     |                              |
| None (no mutation detected)            | 0                                                                  | 0                                                                  | 3 (2.6)                                                             |                              |
| V600E/V600K                            | 34 (82.9)/5 (12.2)                                                 | 19 (76.0)/1 (4.0)                                                  | 0/0                                                                 | –                            |
| Unknown/other/missing data             | 1 <sup>b</sup> (2.4)/1 <sup>c</sup> (2.4)/0                        | 2 <sup>b</sup> (8.0)/0 /3 <sup>a</sup> (12.0)                      | 0/0/114 (97.4)                                                      |                              |
| <i>NRAS</i> mutation status, n (%)     |                                                                    |                                                                    |                                                                     |                              |
| None (no mutation detected)            | 0                                                                  | 5 (20.0)                                                           | 4 <sup>d</sup> (3.4)                                                |                              |
| Q61                                    | 0                                                                  | 0                                                                  | 100 (85.5)                                                          |                              |
| G12/13                                 | 0                                                                  | 0                                                                  | 2 (1.7)                                                             |                              |
| Unknown <sup>e</sup> /Missing data     | 1 (2.4)/40 (97.6)                                                  | 0/20 (80.0)                                                        | 1 <sup>f</sup> (0.9)/10 <sup>g</sup> (8.5)                          |                              |
| Prior antineoplastic medication, n (%) |                                                                    |                                                                    |                                                                     |                              |
| Any prior therapy                      | 27 (65.9)                                                          | 17 (68.0)                                                          | 84 (71.8)                                                           | 128 (69.9)                   |
| <i>BRAF</i> inhibitor                  | 7 (17.1)                                                           | 14 (56.0)                                                          | 0                                                                   | 21 (11.5)                    |
| Number of regimens                     |                                                                    |                                                                    |                                                                     |                              |
| 1                                      | 10 (24.4)                                                          | 3 (12.0)                                                           | 47 (40.2)                                                           | 60 (32.8)                    |
| 2                                      | 11 (26.8)                                                          | 8 (32.0)                                                           | 18 (15.4)                                                           | 37 (20.2)                    |
| 3                                      | 4 (9.8)                                                            | 2 (8.0)                                                            | 10 (8.5)                                                            | 16 (8.7)                     |
| 4                                      | 1 (2.4)                                                            | 2 (8.0)                                                            | 4 (3.4)                                                             | 7 (3.8)                      |
| > 4                                    | 1 (2.4)                                                            | 2 (8.0)                                                            | 5 (4.3)                                                             | 8 (4.4)                      |
| Chemotherapy                           | 16 (39.0)                                                          | 10 (40.0)                                                          | 59 (50.4)                                                           | 85 (46.4)                    |
| Dacarbazine                            | 10 (24.4)                                                          | 4 (16.0)                                                           | 41 (35.0)                                                           | 55 (30.1)                    |
| Immunotherapy                          | 19 (46.3)                                                          | 11 (44.0)                                                          | 52 (44.4)                                                           | 82 (44.8)                    |
| Interferon                             | 10 (24.4)                                                          | 7 (28.0)                                                           | 19 (16.2)                                                           | 36 (19.7)                    |
| Ipilimumab                             | 6 (14.6)                                                           | 6 (24.0)                                                           | 28 (23.9)                                                           | 40 (21.9)                    |
| Other                                  | 3 (7.3)                                                            | 1 (4.0)                                                            | 6 (5.1)                                                             | 10 (5.5)                     |

<sup>a</sup>Of these 4 patients, 3 had mucosal melanoma, and 1 had an unknown primary site of melanoma;

<sup>b</sup>V600E according to local laboratory;

<sup>c</sup>V600R according to local laboratory;

<sup>d</sup>Three Q61R (1 result received after database lock) and one G12 (result received after database lock);

<sup>e</sup>Any other mutation not known; known mutation includes all Q61, A59T, A11T, G12V, G13R;

<sup>f</sup>Q61R according to local laboratory;

<sup>g</sup>Three Q61R, two Q61L, two Q61K, two Q61, and one G12 mutation according to local laboratory.

LDH, lactate dehydrogenase; U/L, upper limit; WHO, World Health Organization.

**Supplementary Table 2: Non-synonymous single nucleotide variant mutations in patients with BRAF or NRAS mutation with categorization based on findings in COSMIC**

| <b>Patients with BRAF mutation in COSMIC</b> |               |             |               |              |              |              |              |             |               |               |             |
|----------------------------------------------|---------------|-------------|---------------|--------------|--------------|--------------|--------------|-------------|---------------|---------------|-------------|
| <b>COSMIC</b>                                | <b>CDKN2A</b> | <b>PTEN</b> | <b>TP53</b>   | <b>EZH2</b>  | <b>TRRAP</b> | <b>EGFR</b>  | <b>MYST3</b> | <b>AKT3</b> | <b>ARID1A</b> | <b>CTNNB1</b> | <b>GNAS</b> |
| <b>Pathogenic</b>                            | 238C>T        | 112C>T      | 1024C>T       | 1936T>A      | 2165C>T      | 994C>T       | 80C>T        | 152T>G      | 4910G>A       | 133T>C        | 679C>G      |
|                                              | 341C>T        | 675T>G      | 451C>T        |              | 7603G>A      |              |              | 49G>A       | 3440C>T       | 110C>A        |             |
|                                              | 205G>T        | 464A>G      | 794T>C        |              | 1577C>T      |              |              |             | 5965C>T       | 134C>A        |             |
| <b>Neutral</b>                               | 71G>C         |             |               |              |              |              |              |             |               |               |             |
| <b>Unknown</b>                               |               |             |               |              |              |              |              |             | 865C>T        |               |             |
| <b>Not in COSMIC</b>                         | 151-1G>A      |             |               |              | 2165C>T      | 1574C>T      | 5791A>G      |             | 3619C>T       |               | 1268C>A     |
|                                              |               |             |               |              | 11135C>T     |              | 4118C>T      |             |               |               | 241G>A      |
|                                              |               |             |               |              | 9233C>A      |              |              |             |               |               | 736C>T      |
|                                              |               |             |               |              | 2165C>T      |              |              |             |               |               | 558G>C      |
|                                              |               |             |               |              | 3807G>C      |              |              |             |               |               | 622C>T      |
|                                              |               |             |               |              |              |              |              |             |               |               | 1203G>A     |
|                                              |               |             |               |              |              |              |              |             |               | 1736G>C       |             |
|                                              |               |             |               |              |              |              |              |             |               | 422C>T        |             |
| <b>Patients with NRAS mutation in COSMIC</b> |               |             |               |              |              |              |              |             |               |               |             |
| <b>COSMIC</b>                                | <b>CDKN2A</b> | <b>TP53</b> | <b>CTNNB1</b> | <b>EP300</b> | <b>FBXW7</b> | <b>CD79B</b> | <b>EPHA3</b> |             |               |               |             |
| <b>Pathogenic</b>                            | 220G>T        | 380C>T      | 94G>A         | 2773C>A      | 1787C>T      | 587A>G       | 2005G>A      |             |               |               |             |
|                                              | 389T>G        | 454C>T      | 110C>G        |              | 1436G>A      |              | 1843G>A      |             |               |               |             |
|                                              | 262G>T        | 541C>T      | 98C>G         |              | 1177C>T      |              | 1732G>A      |             |               |               |             |
|                                              | 341C>T        | 637C>T      | 134C>A        |              | 1673C>T      |              | 2563C>T      |             |               |               |             |
|                                              | 148C>T        | 661G>T      | 137T>C        |              |              |              | 2416G>A      |             |               |               |             |
|                                              | 248A>C        | 722C>T      | 104T>C        |              |              |              |              |             |               |               |             |
|                                              | 238C>T        | 734G>C      |               |              |              |              |              |             |               |               |             |
|                                              |               | 742C>T      |               |              |              |              |              |             |               |               |             |
|                                              |               | 772G>A      |               |              |              |              |              |             |               |               |             |
|                                              |               | 800G>A      |               |              |              |              |              |             |               |               |             |
|                                              | 949C>T        |             |               |              |              |              |              |             |               |               |             |
|                                              | 986C>T        |             |               |              |              |              |              |             |               |               |             |
|                                              | 1009C>T       |             |               |              |              |              |              |             |               |               |             |
| <b>Neutral</b>                               | 172C>T        |             |               |              |              |              |              |             |               |               |             |
|                                              | 44G>A         |             |               |              |              |              |              |             |               |               |             |
| <b>Unknown</b>                               |               |             |               |              |              |              | 855G>A       |             |               |               |             |
| <b>Not in COSMIC</b>                         |               | 1036G>C     | 1693C>T       | 3673A>G      | 1844A>C      |              | 465G>A       |             |               |               |             |
|                                              |               |             | 332C>A        | 2399C>T      |              |              | 621G>T       |             |               |               |             |
|                                              |               |             |               |              |              |              | 2398A>G      |             |               |               |             |
|                                              |               |             |               |              |              |              | 983C>T       |             |               |               |             |
|                                              |               |             |               |              |              |              | 1969G>C      |             |               |               |             |

COSMIC; Catalogue of Somatic Mutations in Cancer.

Available online at: <https://cancer.sanger.ac.uk/cosmic/gene/anlysis>.

**Supplementary Table 3: Frequency of genetic pathway alterations in patients with *BRAF* or *NRAS* mutations**

| Patients with <i>BRAF</i> mutation                                                                                                                                 |                                           | Patients with <i>NRAS</i> mutation                                                                                                                                 |                                           |
|--------------------------------------------------------------------------------------------------------------------------------------------------------------------|-------------------------------------------|--------------------------------------------------------------------------------------------------------------------------------------------------------------------|-------------------------------------------|
| Pathway/process<br>(associated genes)                                                                                                                              | Patients with<br>alteration, <i>n</i> (%) | Pathway/process<br>(associated genes)                                                                                                                              | Patients with<br>alteration, <i>n</i> (%) |
| All patients with analyzed samples                                                                                                                                 | 48                                        | All patients with analyzed samples                                                                                                                                 | 78                                        |
| Cell cycle pathway<br>( <i>AURKA</i> , <i>CCND1</i> , <i>CCND3</i> ,<br><i>CCNE1</i> , <i>CDK4</i> , <i>CDK6</i> , <i>CDKN2A</i> ,<br><i>CDKN2C</i> , <i>RB1</i> ) | 33 (69)                                   | Cell cycle pathway<br>( <i>AURKA</i> , <i>CCND1</i> , <i>CCND3</i> , <i>CCNE1</i> ,<br><i>CDK4</i> , <i>CDK6</i> , <i>CDKN2A</i> , <i>CDKN2C</i> ,<br><i>RB1</i> ) | 45 (58)                                   |
| PI3K<br>( <i>AKT3</i> , <i>PIK3CA</i> , <i>PTEN</i> )                                                                                                              | 13 (27)                                   | P53<br>( <i>MDM2</i> , <i>MDM4</i> , <i>TP53</i> )                                                                                                                 | 21 (27)                                   |
| Epigenetics<br>( <i>ATRX</i> , <i>DNMT3A</i> , <i>EP300</i> , <i>MEN1</i> ,<br><i>SMARCA4</i> , <i>SMARCB1</i> , <i>TET2</i> ,<br><i>TRAAP</i> )                   | 13 (27)                                   | DNA damage response<br>( <i>ATM</i> , <i>BRCA2</i> , <i>BRIPI</i> , <i>FANCA</i> ,<br><i>FANCE</i> , <i>NBN</i> , <i>PALB2</i> , <i>PRKDC</i> ,<br><i>RAD50</i> )  | 21 (27)                                   |
| Transcription factors<br>( <i>CEBPA</i> , <i>MED12</i> , <i>MITF</i> , <i>PAX5</i> ,<br><i>RUNX1</i> , <i>RUNX1T1</i> , <i>SOX10</i> , <i>WT1</i> )                | 10 (21)                                   | Transcription factors<br>( <i>CEBPA</i> , <i>MED12</i> , <i>MITF</i> , <i>PAX5</i> ,<br><i>RUNX1</i> , <i>RUNX1T1</i> , <i>SOX10</i> , <i>WT1</i> )                | 15 (19)                                   |
